# Supplementary material for: Cucurbit[7]uril–tetraphenylethene host–guest system induced emission activity
Source: Royal Society of Chemistry journal article supplement (doi:10.1039/c5ra24264a), 2016-01-01
Supplement: c5ra24264a1.pdf [file c5ra24264a1.pdf]

## **Supporting Information**

### **Cucurbit[7]uril-tetraphenylethene Host-guest System Induced Emission Activity**

Rong Jiang, Shuang Wang, and Jinping Li

## Caption of Content

**Scheme S1.** Synthesis of the guest TATPE.

**Figure S1.**  $^1\text{H}$  NMR spectrum of **2** recorded in  $\text{D}_2\text{O}$  at  $25^\circ\text{C}$ .

**Figure S2.**  $^1\text{H}$  NMR and  $^{13}\text{C}$  NMR spectra of TATPE recorded in  $\text{D}_2\text{O}$  at  $25^\circ\text{C}$ .

**Figure S3.** Partial NOESY NMR spectrum of the complex Q[7]-TATPE recorded in  $\text{D}_2\text{O}$  at  $25^\circ\text{C}$ .

**Figure S4.** The MALDI-TOF mass spectrum of Q[7]-TATPE.

**Figure S5.** Job's plot of  $\Delta F$  in fluorescence intensity of guest TATPE *versus* the molar ratio of  $N_{\text{TATPE}}/(N_{\text{TATPE}} + N_{\text{Q[7]}})$  in water.

**Figure S6.** The TEM image of Q[7]-TATPE (A) and the enlarged TEM image of A (B).

**Figure S7.**  $^1\text{H}$  NMR spectra of TATPE (A), the complex Q[7]-TATPE (B), adding 15.0 equiv. Ada to B (C), the complex Q[7]-Ada (D), and Ada (E) recorded in  $\text{D}_2\text{O}$  at  $25^\circ\text{C}$ .

**Figure S8.** Curves of fluorescence intensity *versus* the molar ratio of  $N_{\text{Ada}}/N_{\text{Q[7]}}$  measured at 464 nm and 396 nm in water.

**Table S1.** Complex stability constant ( $K_a$ ), enthalpy ( $\Delta H^\circ$ ), and entropy changes ( $T\Delta S^\circ$ ) for Q[7]-TATPE.

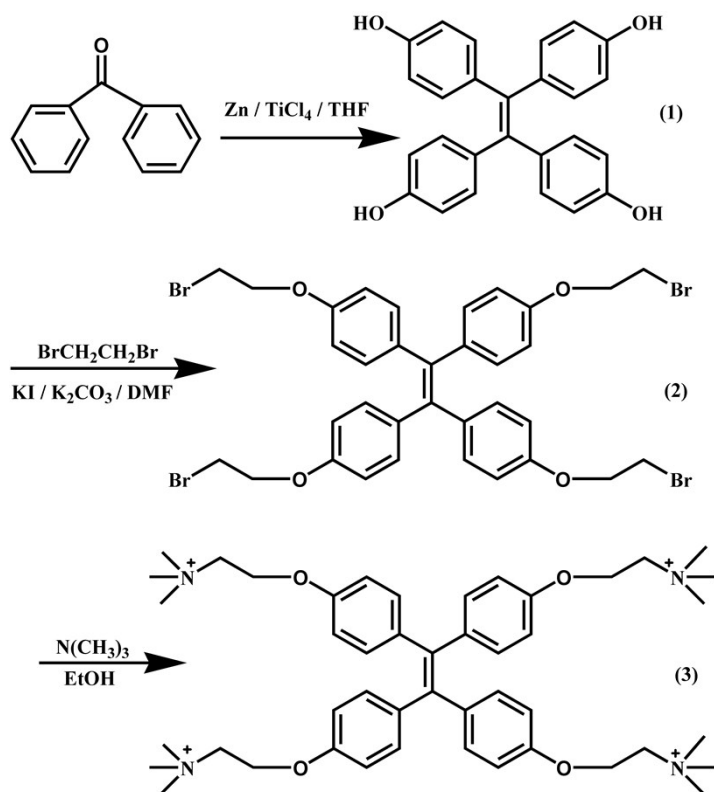

**Scheme S1.** Synthesis of the guest TATPE.

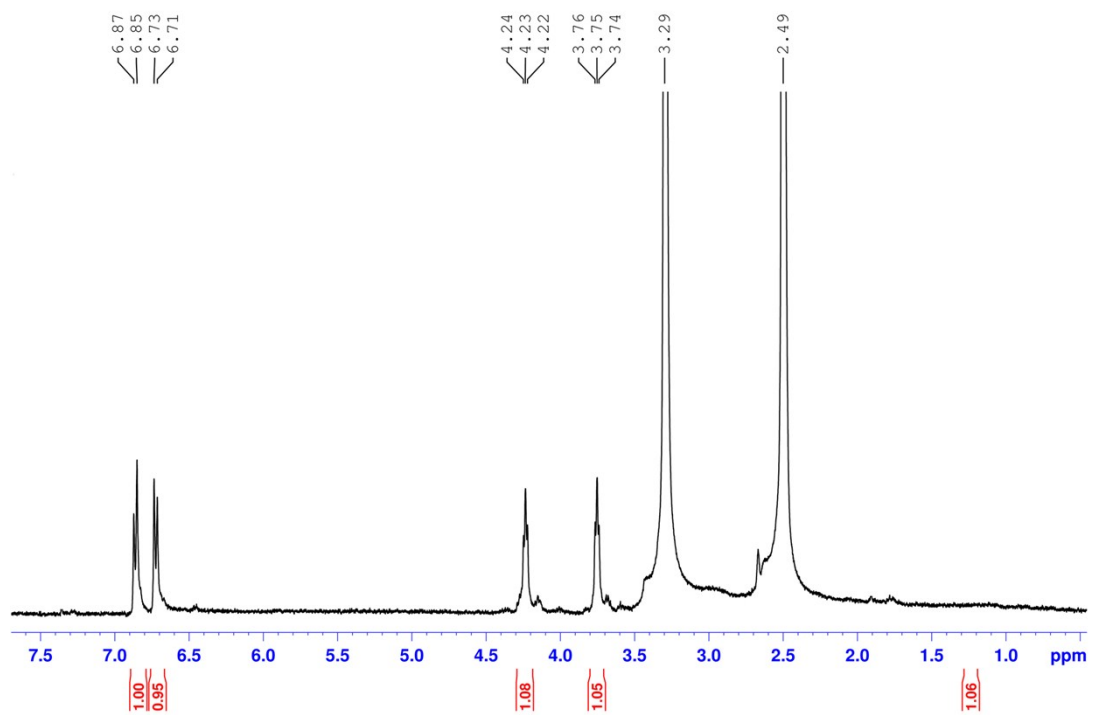

**Figure S1.**  $^1\text{H}$  NMR spectrum of **2** recorded in  $\text{D}_2\text{O}$  at  $25^\circ\text{C}$ .

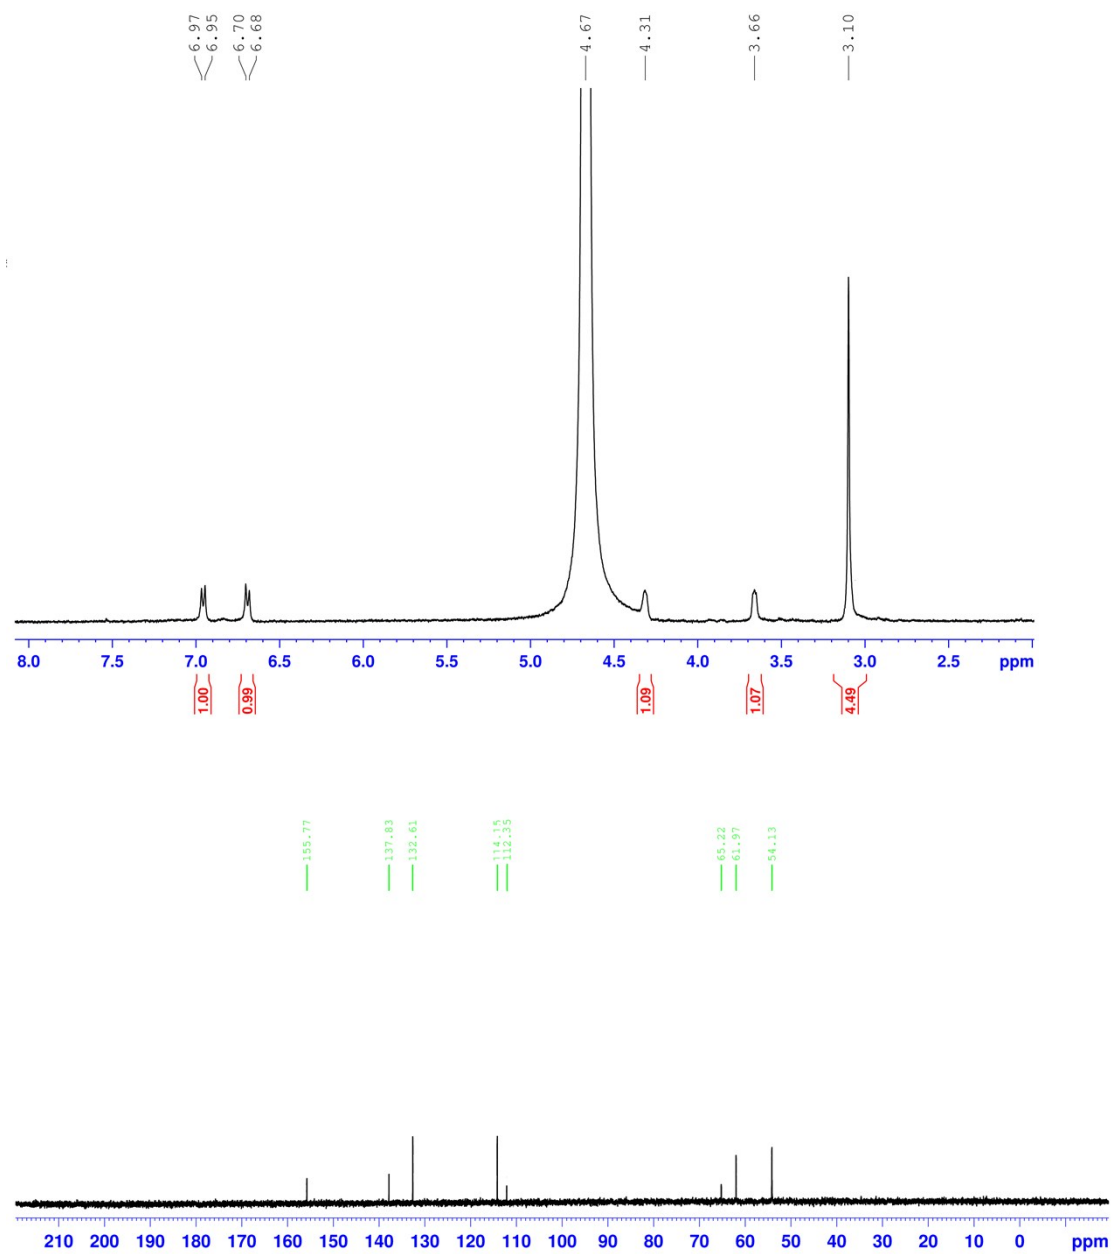

**Figure S2.** <sup>1</sup>H NMR and <sup>13</sup>C NMR spectra of TATPE recorded in D<sub>2</sub>O at 25°C.

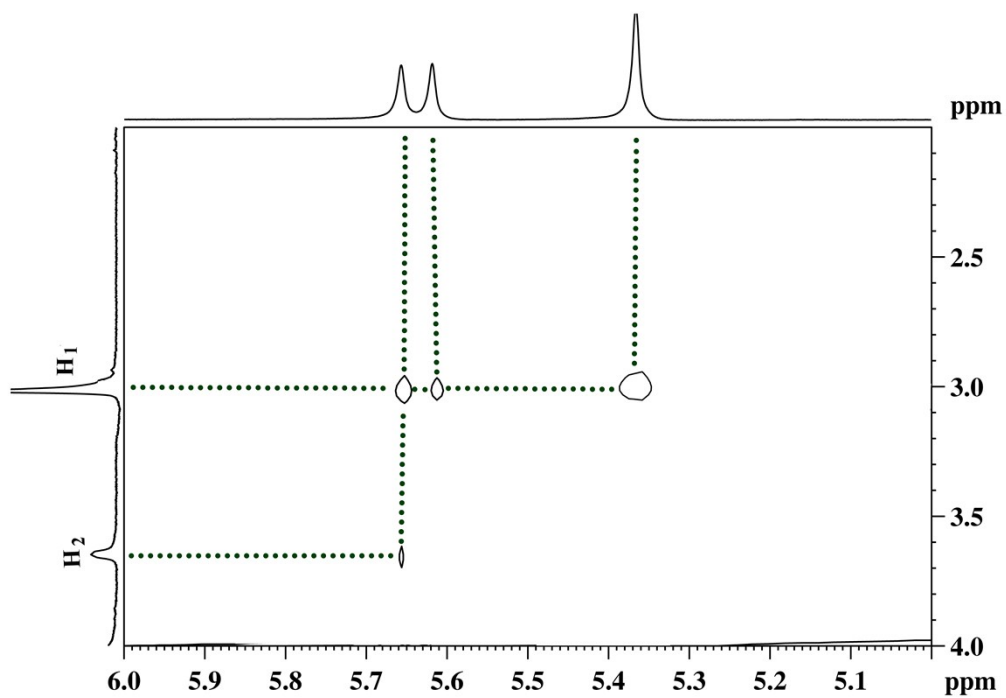

**Figure S3.** Partial NOESY NMR spectrum of the complex Q[7]-TATPE recorded in D<sub>2</sub>O at 25°C.

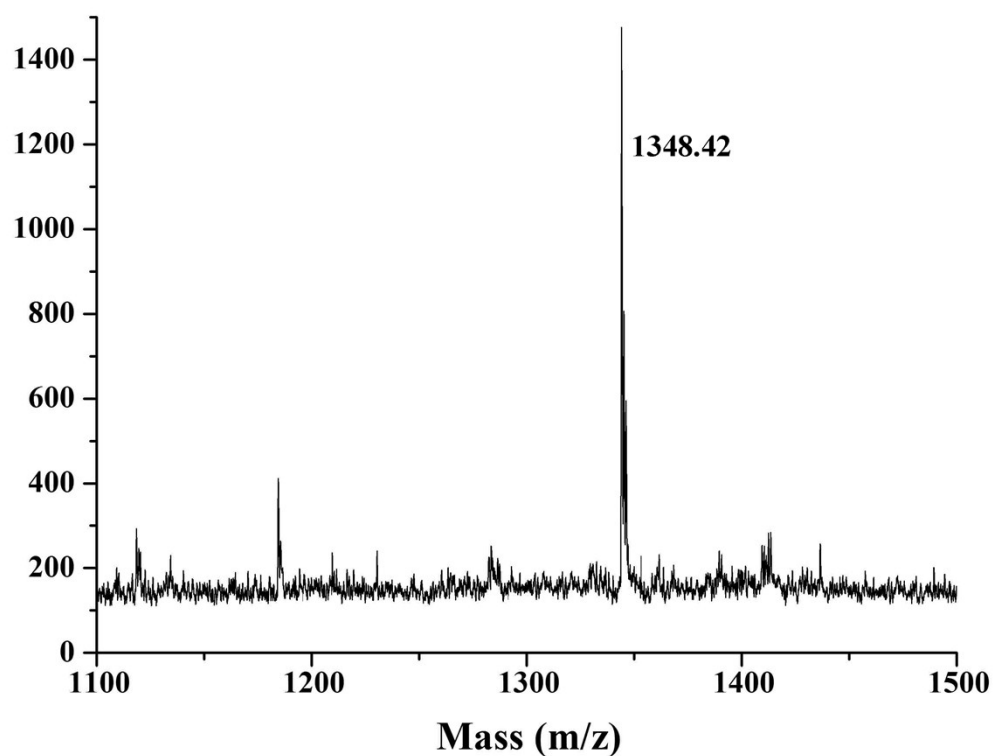

**Figure S4.** The MALDI-TOF mass spectrum of Q[7]-TATPE. It is worth noting that the MALDI-TOF mass spectroscopic results, Figure S4, provide direct support for the formation of the host-guest inclusion complex Q[7]-TATPE. The strongest peak found at  $m/z$  1348.42 corresponds to  $\{4\text{Q[7]-TATPE-4Br}^-\}^{4+}$ .

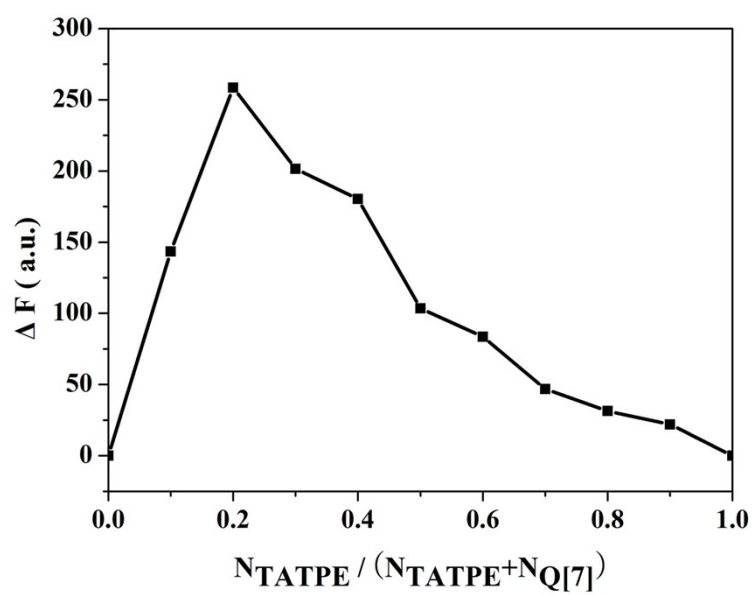

**Figure S5.** Job's plot of  $\Delta F$  in fluorescence intensity of guest TATPE *versus* the molar ratio of  $N_{\text{TATPE}} / (N_{\text{TATPE}} + N_{\text{Q[7]}}$ ) in water.



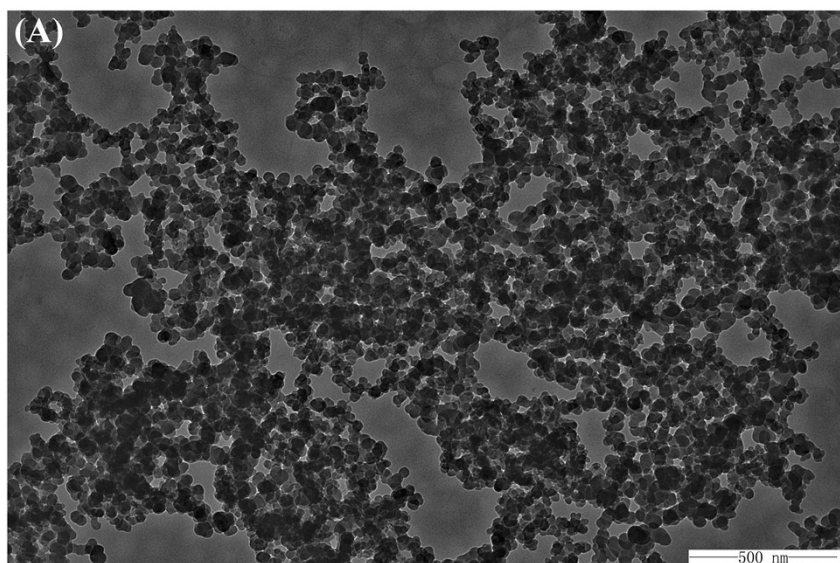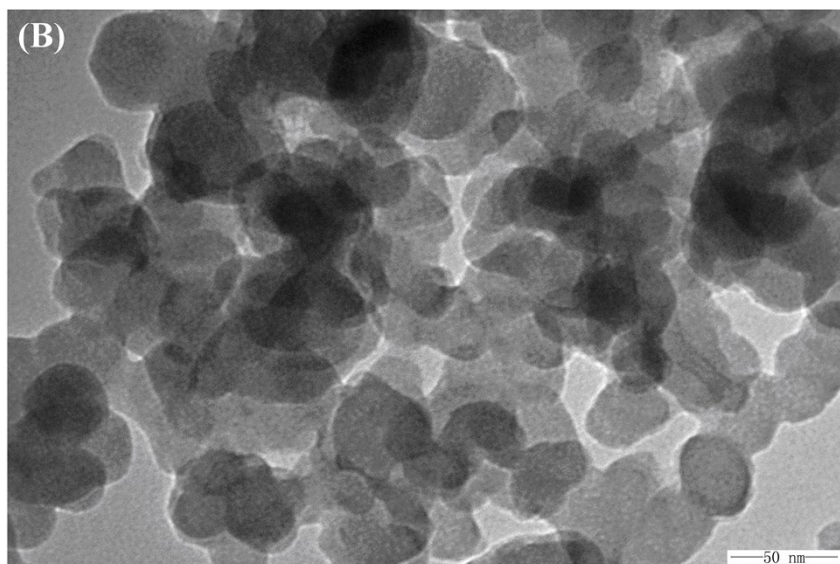

**Figure S6.** The TEM image of Q[7]-TATPE (A) and the enlarged TEM image of A (B).

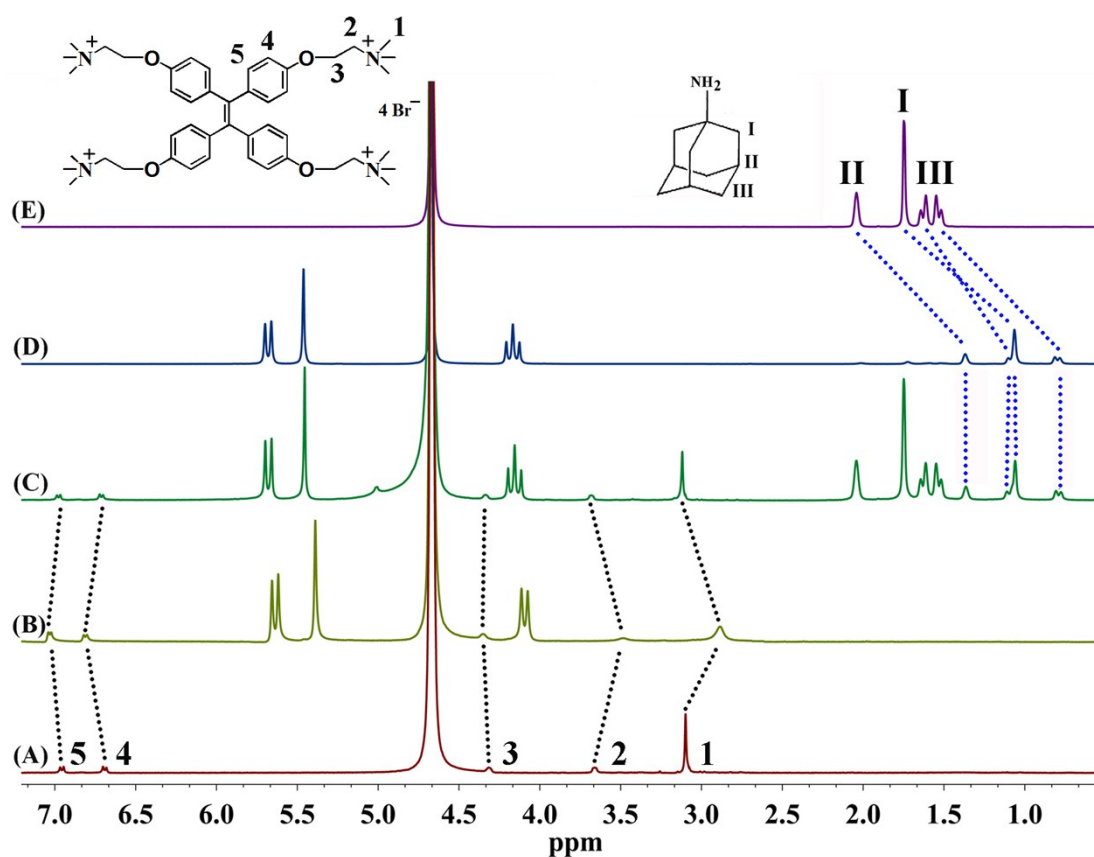

**Figure S7.**  $^1\text{H}$  NMR spectra of TATPE (A), the complex Q[7]-TATPE (B), adding 15.0 equiv. Ada to B (C), the complex Q[7]-Ada (D), and Ada (E) recorded in  $\text{D}_2\text{O}$  at  $25^\circ\text{C}$ .

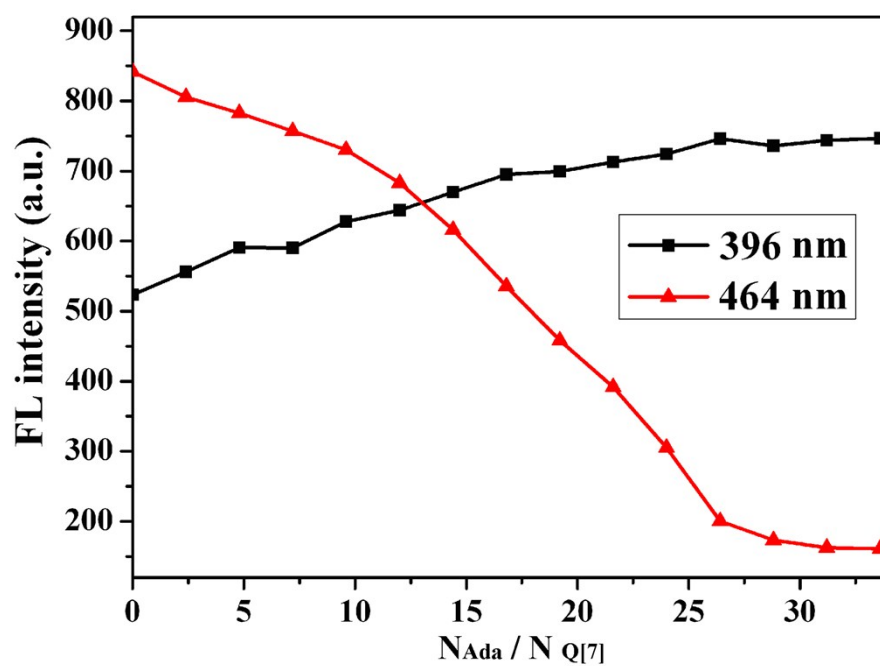

**Figure S8.** Curves of fluorescence intensity *versus* the molar ratio of  $N_{Ada}/N_{Q[7]}$  measured at 464 and 396 nm in water.

**Table S1.** Complex stability constant ( $K_a$ ), enthalpy ( $\Delta H^\circ$ ), and entropy changes ( $T\Delta S^\circ$ ) for Q[7]-TATPE.

| Complex    | $K_a$ ( $M^{-4}$ )            | $\Delta H^\circ$ ( $kJ\ mol^{-1}$ ) | $T\Delta S^\circ$ ( $kJ\ mol^{-1}$ ) |
|------------|-------------------------------|-------------------------------------|--------------------------------------|
| Q[7]-TATPE | $(3.06 \pm 0.16) \times 10^5$ | -93.62                              | -61.24                               |
